# Supplementary material for: Ginsenoside F1 Protects the Brain against Amyloid Beta-Induced Toxicity by Regulating IDE and NEP
Source: MDPI journal article supplement (doi:10.3390/life12010058), 2022-01-01
Supplement: s1 [file s1]

**Table S1. Oligonucleotide primers used for real-time PCR analysis**

| Gene                 | Primer sequence (5' – 3') |                             |
|----------------------|---------------------------|-----------------------------|
| Human IDE            | Forward primer :          | TGCCCTAGACAGGTTGCAC         |
|                      | Reverse primer :          | CTCCAGGCATCATTATCACAT       |
| Human NEP            | Forward primer :          | GATCAGCCTCTCGGTCCTTG        |
|                      | Reverse primer :          | TGTTTTGGATCAGTCGAGCAG       |
| Human $\beta$ -actin | Forward primer :          | CTTCCTGGGCATGGAGTC          |
|                      | Reverse primer :          | AGCACTGTGTTGGCGTACAG        |
| Mouse IDE            | Forward primer :          | CCGGCCATCCAGAGAATAGAA       |
|                      | Reverse primer :          | ACGGTATTCCCGTTTGTCTTCA      |
| Mouse NEP            | Forward primer :          | GAGCCCCTTACTAGGCCTGTGT      |
|                      | Reverse primer :          | CTCGATTACAGACATAGGCTTTCTAAA |
| Mouse $\beta$ -actin | Forward primer :          | GGCTGTATTCCCCTCCATCG        |
|                      | Reverse primer :          | CCAGTTGGTAACAATGCCATGT      |

Table S2. Quantification of Western blot analysis

| Cell lines | Ginsenoside F1<br>( $\mu$ M) | Relative expression level (compare to $\beta$ -actin) |                  |                   |                  |                   |
|------------|------------------------------|-------------------------------------------------------|------------------|-------------------|------------------|-------------------|
|            |                              | 0                                                     | 1                | 2.5               | 5                | 10                |
| Neuro 2 a  | Extra IDE                    | 0.060297262                                           | 0.056816089      | 0.072337993       | 0.070475163      | 0.068852188       |
|            |                              | $\pm 0.00490975$                                      | $\pm 0.00488863$ | $\pm 0.00478263$  | $\pm 0.00813391$ | $\pm 0.00685621$  |
|            | Intra IDE                    | 0.064507161                                           | 0.099518976      | 0.083360618       | 0.102620078      | 0.053867472       |
|            |                              | $\pm 0.00550610$                                      | $\pm 0.00719678$ | $\pm 0.00480450$  | $\pm 0.01086344$ | $\pm 0.00456915$  |
| SH-SY5Y    | Extra NEP                    | 0.140661029                                           | 0.03809949       | 0.052350845       | 0.050497053      | 0.041912808       |
|            |                              | $\pm 0.16850375$                                      | $\pm 0.00043241$ | $\pm 0.00023394$  | $\pm 0.00044273$ | $\pm 0.00054702$  |
|            | Intra NEP                    | 0.031775973                                           | 0.017398984      | 0.058364351       | 0.09337957       | 0.081860579       |
|            |                              | $\pm 0.00446764$                                      | $\pm 0.00311185$ | $\pm 0.00575529$  | $\pm 0.01312376$ | $\pm 0.00974111$  |
|            | Extra IDE                    | 0.016166548                                           | 0.014904626      | 0.017345037       | 0.042489446      | 0.069213963       |
|            |                              | $\pm 0.00050224$                                      | $\pm 0.00046054$ | $\pm 0.00037325$  | $\pm 0.00076560$ | $\pm 0.00326720$  |
|            | Intra IDE                    | 0.097198707                                           | 0.184624739      | 0.136852251       | 0.18602652       | 0.169503936       |
|            |                              | $\pm 0.11074645$                                      | $\pm 0.20917092$ | $\pm 0.15541457$  | $\pm 0.21010480$ | $\pm 0.19178243$  |
|            | Extra NEP                    | 0.040847406                                           | 0.045906719      | 0.061102445       | 0.103538657      | 0.065748978       |
|            |                              | $\pm 0.0042865$                                       | $\pm 0.00174226$ | $\pm 0.0018077$   | $\pm 0.0035553$  | $\pm 0.00200912$  |
|            | Intra NEP                    | 0.058934134                                           | 0.072746579      | 0.068442722       | 0.069664999      | 0.043325967       |
|            |                              | $\pm 0.0079543$                                       | $\pm 0.00993095$ | $\pm 0.008048348$ | $\pm 0.00874212$ | $\pm 0.006726617$ |
